# Supplementary material for: A Machine Learning Method to Identify Umami Peptide Sequences by Using Multiplicative LSTM Embedded Features
Source: MDPI journal article supplement (doi:10.3390/foods12071498), 2023-04-02
Supplement: s1 [file s1]

## Supplementary table legends:

**Supplementary Table S1.** Results of 10-fold cross-validation and independent testing of the five machine learning (ML) models balanced with synthetic minority over-sampling technique (SMOTE) and the five ML models balanced without SMOTE.

| Model                   | 10-fold cross-validation |              |              |              |              |              | Independent test |              |                          |              |              |              |
|-------------------------|--------------------------|--------------|--------------|--------------|--------------|--------------|------------------|--------------|--------------------------|--------------|--------------|--------------|
|                         | ACC                      | MCC          | Sn           | Sp           | auROC        | BACC         | ACC              | MCC          | Sn                       | Sp           | auROC        | BACC         |
| KNN <sup>c</sup>        | 0.816                    | 0.566        | 0.652        | 0.892        | 0.840        | 0.830        | 0.830            | 0.593        | 0.646                    | 0.915        | 0.867        | 0.781        |
| KNN-SMOTE <sup>c</sup>  | <b>0.861<sup>b</sup></b> | 0.727        | 0.917        | 0.805        | 0.924        | <b>0.861</b> | 0.807            | 0.589        | <b>0.818<sup>a</sup></b> | 0.802        | 0.875        | 0.810        |
| LR <sup>c</sup>         | 0.858                    | 0.686        | 0.814        | 0.880        | 0.906        | 0.855        | <b>0.855</b>     | <b>0.658</b> | 0.721                    | 0.916        | 0.925        | <b>0.819</b> |
| LR-SMOTE <sup>c</sup>   | <b>0.921</b>             | <b>0.847</b> | <b>0.954</b> | 0.888        | 0.956        | <b>0.921</b> | 0.853            | 0.653        | 0.721                    | 0.913        | <b>0.928</b> | 0.817        |
| SVM <sup>c</sup>        | 0.688                    | 0.051        | 0.018        | <b>1.000</b> | 0.850        | 0.694        | 0.694            | 0.126        | 0.029                    | <b>1.000</b> | 0.788        | 0.514        |
| SVM-SMOTE <sup>c</sup>  | <b>0.865</b>             | 0.756        | 0.738        | 0.992        | <b>0.981</b> | <b>0.865</b> | 0.716            | 0.258        | 0.100                    | 0.998        | 0.789        | 0.549        |
| RF <sup>c</sup>         | 0.831                    | 0.599        | 0.611        | 0.933        | 0.918        | 0.821        | 0.821            | 0.567        | 0.600                    | 0.923        | 0.876        | 0.761        |
| RF-SMOTE <sup>c</sup>   | <b>0.917</b>             | 0.837        | 0.942        | 0.892        | 0.967        | <b>0.917</b> | 0.836            | 0.617        | 0.725                    | 0.887        | 0.893        | 0.806        |
| LGBM <sup>c</sup>       | 0.841                    | 0.630        | 0.716        | 0.900        | 0.904        | 0.835        | 0.835            | 0.607        | 0.682                    | 0.905        | 0.905        | 0.794        |
| LGBM-SMOTE <sup>c</sup> | <b>0.919</b>             | 0.841        | 0.946        | 0.892        | 0.972        | <b>0.919</b> | 0.845            | 0.636        | 0.729                    | 0.898        | 0.907        | 0.813        |

<sup>a</sup>The best performance values are indicated in bold and underlined.

<sup>b</sup>Blue indicates equal values of ACC and BACC.

<sup>c</sup>LR: logistic regression; KNN: *k*-nearest neighbors; SVM: support vector machine; LGBM: light gradient boosting machine; RF: random forest. SMOTE: synthetic minority over-sampling technique.

**Supplementary Table S2.** Prediction-probability results of the three models and details of 91 wet-experiment validated umami peptide sequences collected from the latest research.

| ID | Seq        | REF | ● Umami | Prediction-probability |          |            |
|----|------------|-----|---------|------------------------|----------|------------|
|    |            |     |         | iUmami-DRLF            | iUP-BERT | UMPred-FRL |
| 1  | EFLKEQF    | [1] | ● YES   | 12.30%                 | 48.30%   | 45.80%     |
| 2  | KALSEELDN  | [1] | ● YES   | 98.88%                 | 86.59%   | 22.60%     |
| 3  | AAEAKLELLE | [1] | ● YES   | 99.56%                 | 75.09%   | 86.50%     |
| 4  | KETLEQEKSG | [1] | ● YES   | 99.18%                 | 56.81%   | 87.30%     |
| 5  | TWKE       | [1] | ● YES   | 99.42%                 | 39.79%   | 10.20%     |
| 6  | DLRAD      | [1] | ● YES   | 99.63%                 | 76.87%   | 28.40%     |
| 7  | DDLDR      | [1] | ● YES   | 93.33%                 | 38.01%   | 79.30%     |
| 8  | KSLEEA     | [1] | ● YES   | 99.70%                 | 72.43%   | 93.50%     |
| 9  | MQAMKLEK   | [1] | ● YES   | 89.05%                 | 60.34%   | 88.60%     |
| 10 | DQLEKQVK   | [1] | ● YES   | 99.51%                 | 43.44%   | 76.80%     |
| 11 | AKALKEEDL  | [1] | ● YES   | 99.91%                 | 77.03%   | 10.20%     |
| 12 | TGFLPEEYMK | [1] | ● YES   | 41.84%                 | 24.68%   | 42.10%     |
| 13 | AMKLEKENAL | [1] | ● YES   | 96.87%                 | 61.80%   | 57.30%     |
| 14 | VADLMR     | [2] | ● YES   | 14.81%                 | 39.60%   | 58.80%     |
| 15 | STELFK     | [2] | ● YES   | 86.09%                 | 57.79%   | 73.20%     |
| 16 | DALKKK     | [2] | ● YES   | 97.78%                 | 25.19%   | 70.10%     |
| 17 | FVGLQER    | [2] | ● YES   | 34.05%                 | 51.04%   | 25.80%     |
| 18 | VVLNPVARVE | [2] | ● YES   | 94.30%                 | 48.22%   | 33.00%     |
| 19 | AGFMPLP    | [3] | ● YES   | 0.09%                  | 11.40%   | 28.20%     |
| 20 | APYSGY     | [3] | ● YES   | 27.94%                 | 15.10%   | 2.50%      |
| 21 | PPMF       | [3] | ● YES   | 0.04%                  | 1.16%    | 5.40%      |
| 22 | SLSSLMK    | [3] | ● YES   | 4.20%                  | 28.35%   | 67.90%     |
| 23 | VAMNPVDHPH | [3] | ● YES   | 30.82%                 | 11.49%   | 88.60%     |
| 24 | DK         | [4] | ● YES   | 99.96%                 | 85.56%   | 96.90%     |
| 25 | EEK        | [4] | ● YES   | 94.86%                 | 56.69%   | 95.60%     |
| 26 | EDQK       | [4] | ● YES   | 97.17%                 | 94.10%   | 98.50%     |
| 27 | SEGR       | [4] | ● YES   | 85.65%                 | 89.48%   | 94.20%     |
| 28 | QDSIGS     | [4] | ● YES   | 61.64%                 | 81.11%   | 34.60%     |
| 29 | RD         | [5] | ● YES   | 98.99%                 | 39.30%   | 98.80%     |
| 30 | DGV        | [5] | ● YES   | 99.84%                 | 35.04%   | 77.80%     |
| 31 | FSGLDGAK   | [6] | ● YES   | 3.23%                  | 58.67%   | 11.80%     |
| 32 | FAGDDAPR   | [6] | ● YES   | 14.50%                 | 43.70%   | 29.40%     |
| 33 | FSGLDGSK   | [6] | ● YES   | 1.37%                  | 53.35%   | 9.70%      |
| 34 | DGF        | [7] | ● YES   | 95.37%                 | 60.34%   | 18.30%     |
| 35 | KCGQ       | [7] | ● YES   | 100.00%                | 30.61%   | 36.70%     |
| 36 | HHYE       | [7] | ● YES   | 0.00%                  | 22.12%   | 90.70%     |

|    |               |      |       |         |        |        |
|----|---------------|------|-------|---------|--------|--------|
| 37 | INKPGL        | [8]  | ● YES | 1.03%   | 7.54%  | 11.40% |
| 38 | SDSCI         | [8]  | ● YES | 100.00% | 19.77% | 76.40% |
| 39 | GDPER         | [8]  | ● YES | 90.69%  | 82.00% | 54.60% |
| 40 | TGC           | [9]  | ● YES | 100.00% | 45.52% | 79.00% |
| 41 | GLE           | [9]  | ● YES | 2.34%   | 28.90% | 35.50% |
| 42 | VEAL          | [9]  | ● YES | 98.90%  | 20.87% | 67.20% |
| 43 | GGE           | [9]  | ● YES | 99.32%  | 52.08% | 5.00%  |
| 44 | EVC           | [9]  | ● YES | 100.00% | 23.78% | 93.90% |
| 45 | DAE           | [9]  | ● YES | 100.00% | 88.06% | 88.20% |
| 46 | EPLCNQ        | [10] | ● YES | 100.00% | 43.83% | 46.90% |
| 47 | SGCVNEL       | [10] | ● YES | 100.00% | 82.26% | 91.20% |
| 48 | PHEMQ         | [10] | ● YES | 91.12%  | 59.55% | 78.80% |
| 49 | SEPSHF        | [10] | ● YES | 95.38%  | 66.58% | 82.00% |
| 50 | ESCAPQL       | [10] | ● YES | 100.00% | 81.36% | 68.80% |
| 51 | MTNLLEDLSFR   | [11] | ● YES | 4.04%   | 30.83% | 77.50% |
| 52 | GFGDSCTPGKNER | [11] | ● YES | 100.00% | 31.15% | 73.80% |
| 53 | YADSNIQINGTDR | [11] | ● YES | 64.55%  | 51.39% | 40.90% |
| 54 | AREALQELGEQAK | [11] | ● YES | 99.82%  | 29.70% | 29.60% |
| 55 | IQQDDCK       | [11] | ● YES | 100.00% | 43.34% | 98.70% |
| 56 | QAEADAR       | [11] | ● YES | 100.00% | 66.68% | 92.10% |
| 57 | HLQLAIR       | [12] | ● YES | 0.10%   | 15.22% | 35.50% |
| 58 | DPLRGGYY      | [12] | ● YES | 8.80%   | 17.46% | 4.60%  |
| 59 | AGLQFPVGR     | [12] | ● YES | 2.24%   | 12.83% | 11.10% |
| 60 | LLLPGELAK     | [12] | ● YES | 19.02%  | 7.31%  | 89.80% |
| 61 | AGFAGDDAPR    | [12] | ● YES | 5.33%   | 34.18% | 46.50% |
| 62 | GYSFTTAER     | [12] | ● YES | 99.89%  | 50.00% | 32.00% |
| 63 | DAGVIAGLNVLR  | [12] | ● YES | 2.91%   | 20.93% | 91.60% |
| 64 | HEAL          | [13] | ● YES | 88.70%  | 37.71% | 73.20% |
| 65 | LREY          | [13] | ● YES | 98.93%  | 31.87% | 94.50% |
| 66 | LAKVH         | [13] | ● YES | 99.47%  | 30.71% | 75.00% |
| 67 | FQKVVA        | [13] | ● YES | 64.51%  | 40.28% | 90.00% |
| 68 | HVKELE        | [13] | ● YES | 94.26%  | 57.35% | 74.30% |
| 69 | AEVKKAP       | [13] | ● YES | 92.08%  | 66.53% | 79.00% |
| 70 | KALSEEL       | [13] | ● YES | 99.87%  | 93.97% | 80.40% |
| 71 | KKMFETES      | [13] | ● YES | 98.09%  | 62.93% | 88.90% |
| 72 | EAVEKPQS      | [13] | ● YES | 73.60%  | 50.00% | 96.90% |
| 73 | DAPYDYK       | [14] | ● YES | 41.19%  | 33.97% | 50.00% |
| 74 | LLDAFFFDNK    | [14] | ● YES | 10.39%  | 21.24% | 4.90%  |
| 75 | MAASGDVGK     | [14] | ● YES | 74.19%  | 57.44% | 32.30% |
| 76 | NALKSVECYDAR  | [14] | ● YES | 100.00% | 42.99% | 88.90% |
| 77 | AKLTSLEECCQR  | [14] | ● YES | 100.00% | 30.53% | 95.80% |
| 78 | YLASCLSSVKEEK | [14] | ● YES | 100.00% | 22.59% | 35.50% |

|    |                  |      |       |         |        |        |
|----|------------------|------|-------|---------|--------|--------|
| 79 | MEREQEESTMR      | [14] | ● YES | 79.35%  | 28.19% | 96.20% |
| 80 | SGVVAAVNDAAKDFHG | [14] | ● YES | 99.17%  | 36.69% | 48.20% |
| 81 | VLSLNSGTEAVEAAIK | [14] | ● YES | 97.84%  | 52.04% | 44.20% |
| 82 | DDF              | [15] | ● YES | 99.82%  | 23.34% | 94.60% |
| 83 | ADC              | [15] | ● YES | 100.00% | 23.69% | 94.10% |
| 84 | DNW              | [15] | ● YES | 99.74%  | 19.28% | 13.20% |
| 85 | QDF              | [15] | ● YES | 99.70%  | 63.34% | 50.00% |
| 86 | IGDM             | [15] | ● YES | 91.50%  | 40.07% | 92.40% |
| 87 | DCIY             | [15] | ● YES | 100.00% | 25.78% | 88.30% |
| 88 | AGCD             | [15] | ● YES | 99.98%  | 38.16% | 74.50% |
| 89 | QDTW             | [15] | ● YES | 99.98%  | 22.14% | 6.70%  |
| 90 | SGDAW            | [15] | ● YES | 99.22%  | 27.35% | 20.80% |
| 91 | NDDGW            | [15] | ● YES | 79.23%  | 22.24% | 52.90% |

## References

- Zhang, T.; Hua, Y.; Zhou, C.; Xiong, Y.; Pan, D.; Liu, Z.; Dang, Y., Umami peptides screened based on peptidomics and virtual screening from *Ruditapes philippinarum* and *Macrura veneriformis* clams. *Food Chemistry* **2022**, 394, 133504.
- Shiyan, R.; Liping, S.; Xiaodong, S.; Jinlun, H.; Yongliang, Z., Novel umami peptides from tilapia lower jaw and molecular docking to the taste receptor T1R1/T1R3. *Food Chemistry* **2021**, 362, 130249.
- Gao, B.; Hu, X.; Xue, H.; Li, R.; Liu, H.; Han, T.; Ruan, D.; Tu, Y.; Zhao, Y., Isolation and screening of umami peptides from preserved egg yolk by nano-HPLC-MS/MS and molecular docking. *Food Chemistry* **2022**, 377, 131996.
- Yu, Z.; Kang, L.; Zhao, W.; Wu, S.; Ding, L.; Zheng, F.; Liu, J.; Li, J., Identification of novel umami peptides from myosin via homology modeling and molecular docking. *Food Chemistry* **2021**, 344, 128728.
- Cao, C.; Wang, J.; Kwok, D.; Cui, F.; Zhang, Z.; Zhao, D.; Li, M. J.; Zou, Q., webTWAS: a resource for disease candidate susceptibility genes identified by transcriptome-wide association study. *Nucleic Acids Research* **2022**, 50, (D1), D1123-d1130.
- Jiang, J.; Lin, X.; Jiang, Y.; Jiang, L.; Lv, Z., Identify Bitter Peptides by Using Deep Representation Learning Features. *International Journal of Molecular Sciences* **2022**, 23, (14), 7877.
- Song, S.; Zhuang, J.; Ma, C.; Feng, T.; Yao, L.; Ho, C.-T.; Sun, M., Identification of novel umami peptides from *Boletus edulis* and its mechanism via sensory analysis and molecular simulation approaches. *Food Chemistry* **2023**, 398, 133835.
- Zhu, W.; He, W.; Wang, F.; Bu, Y.; Li, X.; Li, J., Prediction, molecular docking and identification of novel umami hexapeptides derived from Atlantic cod (*Gadus morhua*). *International Journal of Food Science & Technology* **2021**, 56, (1), 402-412.
- Zhu, X.; Sun-Waterhouse, D.; Chen, J.; Cui, C.; Wang, W., Comparative study on the novel umami-active peptides of the whole soybeans and the defatted soybeans fermented soy sauce. *Journal of the Science of Food and Agriculture* **2021**, 101, (1), 158-166.
- Chen, W.; Li, W.; Wu, D.; Zhang, Z.; Chen, H.; Zhang, J.; Wang, C.; Wu, T.; Yang, Y., Characterization of novel umami-active peptides from *Stropharia rugoso-annulata* mushroom and in silico study on action mechanism. *Journal of Food Composition and Analysis* **2022**, 110, 104530.
- Charoenkwan, P.; Nantasenamat, C.; Hasan, M. M.; Moni, M. A.; Manavalan, B.; Shoombuatong, W., UMPred-FRL: A New Approach for Accurate Prediction of Umami Peptides Using Feature Representation Learning. *International Journal of Molecular Sciences* **2021**, 22, (23), 13124.
- Liu, Z.; Zhu, Y.; Wang, W.; Zhou, X.; Chen, G.; Liu, Y., Seven novel umami peptides from *Takifugu rubripes* and their taste characteristics. *Food Chemistry* **2020**, 330, 127204.

13. Liu, Q.; Gao, X.; Pan, D.; Liu, Z.; Xiao, C.; Du, L.; Cai, Z.; Lu, W.; Dang, Y.; Zou, Y., Rapid screening based on machine learning and molecular docking of umami peptides from porcine bone. *Journal of the Science of Food and Agriculture* **2022**.
14. Zhu, W.; Luan, H.; Bu, Y.; Li, X.; Li, J.; Zhang, Y., Identification, taste characterization and molecular docking study of novel umami peptides from the Chinese anchovy sauce. *Journal of the Science of Food and Agriculture* **2021**, 101, (8), 3140-3155.
15. Wang, Y.; Luan, J.; Tang, X.; Zhu, W.; Xu, Y.; Bu, Y.; Li, J.; Cui, F.; Li, X., Identification of umami peptides based on virtual screening and molecular docking from Atlantic cod (*Gadus morhua*). *Food & Function* **2023**, 14, (3), 1510-1519.

## Supplementary figures legends:

### *iUmami-DRLF*

To identify umami peptides from sequence via pretrained deep representation learning models

[Home](#) | [Server](#) | [Dataset](#)

#### Introduction

Here, we developed a web-server named *iUmami-DRLF* to identify whether peptides are umami peptides or not. The model of *iUmami-DRLF* is based on logistic regression (LR) algorithms and is used only one type of sequence features, that is sequence-based unified representation (*UniRep*). Also *iUmami-DRLF* is optimized with light gradient boosting machine feature selection method and the synthetic minority over-sampling technique (SMOTE) balancing method. *iUmami-DRLF* achieves the SOTA performance over previous models using the same training and testing datasets.

As compared with SOTA methods, *iUmami-DRLF* shows stronger robustness and more powerful generalizability for real dataset prediction.

#### Framework

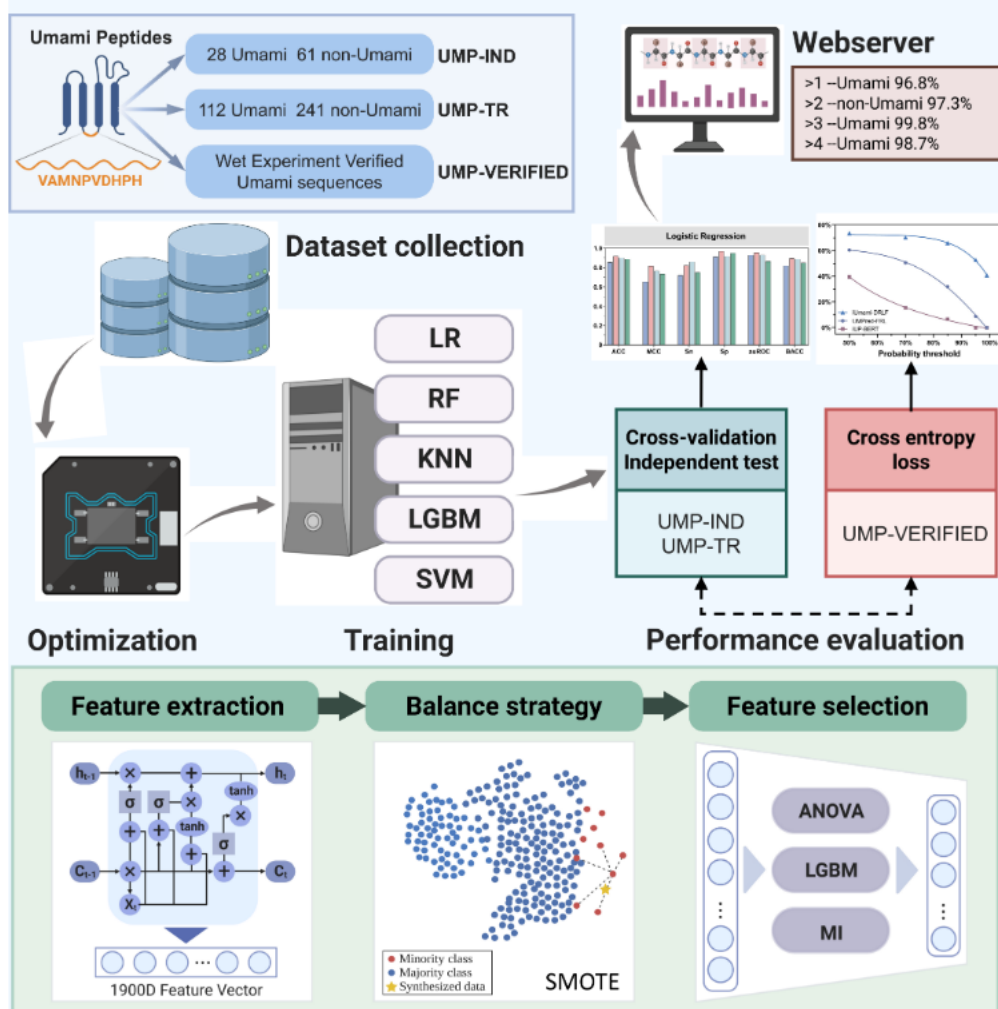

**Supplementary Figure S1.** Screenshots of the *iUmami-DRLF* webserver. Users can access the webserver by entering <https://www.aibiochem.net/servers/iUmami-DRLF/>, which would bring us to the webpage as shown in Supplemental Figure 1.

## *iUmami-DRLF*

a web server for the identification of umami peptides merely using sequence-based deep representation learning features

[Home](#) | [Server](#) | [Dataset](#)

### Input Peptides sequence in *FASTA* format and *Run*

Please input no more than 10 sequences. If there is a 504 error or other errors, please wait for a few minutes and refresh the page again. Or wait for several minutes and then resubmit the task. If you need to predict more 10 sequences, please contact Dr.Lv.

### Example

| SEQUENCES | UMAMI PEPTIDES | CONFIDENCE |
|-----------|----------------|------------|
| RKE       | YES            | 96.16%     |
| VAV       | YES            | 97.34%     |
| KGDEESLA  | YES            | 99.57%     |
| SAEQK     | YES            | 99.76%     |
| CM        | YES            | 99.98%     |
| DG        | YES            | 99.75%     |
| DE        | YES            | 100.00%    |
| EEL       | YES            | 99.82%     |
| LVG       | YES            | 98.98%     |
| SLAKGDEE  | YES            | 92.84%     |
| DD        | YES            | 99.97%     |
| VGG       | YES            | 88.84%     |
| EEE       | YES            | 99.84%     |
| LSERYP    | YES            | 96.72%     |
| GCG       | YES            | 99.23%     |

**Supplementary Figure S2.** Screenshots of the iUmami-DRLF webserver. Users can begin the prediction process by entering the query sequence into the text box and clicking the "Run" button; this step typically takes a few seconds for the server to process the task.

### ***iUmami-DRLF***

a web server for the identification of umami peptides merely using sequence-based deep representation learning features

[Home](#) | [Server](#) | [Dataset](#)

### ***Results***

| SEQUENCES  | UMAMI PEPTIDES | CONFIDENCE |
|------------|----------------|------------|
| DDLDR      | YES            | 93.33%     |
| KSLEEA     | YES            | 99.70%     |
| MQAMKLEK   | YES            | 89.05%     |
| DQLEKQVK   | YES            | 99.51%     |
| AKALKEEDL  | YES            | 99.91%     |
| TGFLPEEYMK | NO             | 58.16%     |
| AMKLEKENAL | YES            | 96.87%     |
| VADLMR     | NO             | 85.19%     |
| STELFK     | YES            | 86.09%     |
| DALKKK     | YES            | 97.78%     |
| FVGLQER    | NO             | 65.95%     |

**Please cite** iUmami-DRLF: a Web server for the Identification of umami peptides merely using sequence-based deep representation learning features  
If you have any questions, please contact Dr.Lv [hzhbin@pku.edu.cn](mailto:hzhbin@pku.edu.cn)  
[DOI:10.26434/chemrxiv-2023-19038](#)

**Supplementary Figure S3.** Screenshots of the iUmami-DRLF webserver. After the prediction process is completed, the results are displayed on the webserver.
